# Supplementary material
Source: PubMed Central journal article supplement (PMC3326485)
Supplement: 1203453109_pnas.201203453SI.pdf [file 1203453109_pnas.201203453SI.pdf]

# Supporting Information

Kim et al. 10.1073/pnas.1203453109

## SI Materials and Methods

**MNase Analysis.** MNase analysis of bulk chromatin from yeast cells were performed as described (1). Briefly, cells were grown in 50 mL of YPD media to the cell density of  $10^7$  cells/mL. Spheroplasting was done with 1 mg/mL zymolyase 100T (US Biological) at 30 °C for 5~10 min. To digest chromatin from  $2 \times 10^6$  cells per mL, 1, 2, 4, or 8 U of MNase (Worthington) was used in 200  $\mu$ L of digestion buffer (10 mM Hepes-Na at pH 7.5, 0.5 mM MgCl<sub>2</sub>, and 0.05 mM CaCl<sub>2</sub>) at 37 °C for 5 min. The reaction was then stopped by 25  $\mu$ L of stop buffer containing 5 mg/mL of proteinase K, 1 mM EGTA, and 5% (wt/vol) SDS.

**Superhelical Density Analysis.** Plasmid DNA was extracted from 10 mL of culture in YPD, the density of which was  $10^7$  cells per mL, as described in the literature (2). Twenty micrograms of extracted DNA was run on 0.8% of agarose gel in 1 $\times$  TPE buffer containing 10  $\mu$ g/mL chloroquine and was subject to Southern blot analysis by using a probe specific to *URA3* on the plasmid.

**Flow Cytometry Analysis.** Cells were prepared as described in *Current Protocols in Cytometry* (3). DNA content stained with propidium iodide was analyzed by FACSCalibur (BD Biosciences).

- Zhang Z, Reese JC (2006) Isolation of yeast nuclei and micrococcal nuclease mapping of nucleosome positioning. *Methods Mol Biol* 313:245–255.
- Morse RH (2009) Analysis of DNA topology in yeast chromatin. *Methods Mol Biol* 523: 93–108.

- Lloyd D (2001) Flow cytometry of yeasts. *Curr Protoc Cytom*, 10.1002/0471142956. cy1110s09.

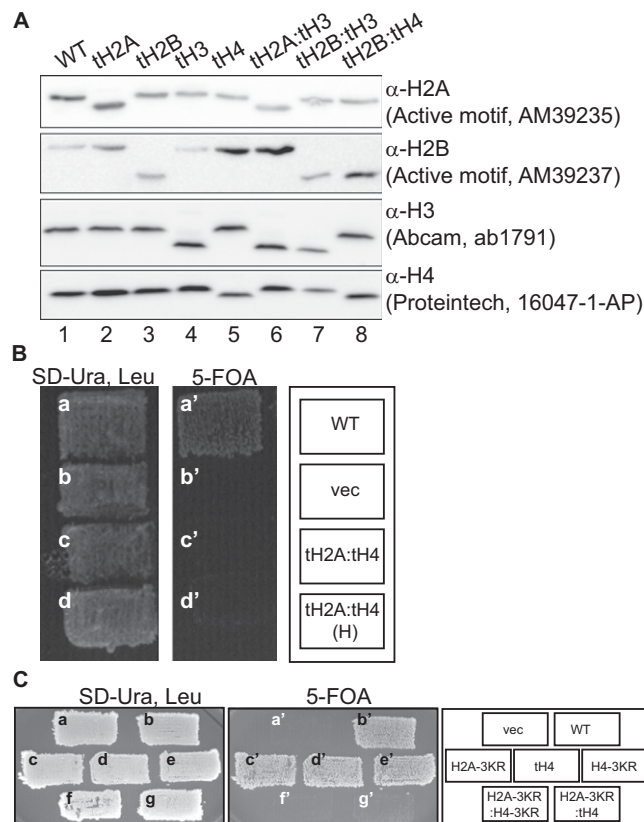

**Fig. S1.** (A) Immunoblots for core histones in wild-type and histone tail deletion strains. Whole-cell extracts from the histone tail deletes and wild-type cells were subjected to immunoblot analyses with indicated antibodies. (B) Viability of histone shuffle strains. Cells on the SD-ura, Leu plate carry mutant histone genes: wild-type H2A/H2B/H3/H4 (WT) (a), empty vector alone (vec) (b), tH2A/H2B/H3/tH4 (tH2A:tH4) (c), tH2A/H2B/H3/tH4 in pRS426 [tH2A:tH4 (H)] (d) as well as their wild-type counterparts in separate plasmids. Cells on the 5-FOA plate lacking wild-type histone genes in the *URA3* plasmid were marked with a'–d'. (C) Viability of histone shuffle strains containing tailless histones: empty vector (vec) (a), wild-type H2A/H2B/H3/H4 genes (WT) (b), H2A-3KR (K4,7,13R)/H2B/H3/H4 (H2A-3KR) (c), H2A/H2B/H3/tH4 (tH4) (d), H2A/H2B/H3/H4-3KR (K5,8,12R) (H4-3KR) (e), H2A-3KR/H2B/H3/H4-3KR (H2A-3KR:H4-3KR) (f), H2A-3KR/H2B/H3/tH4 (H2A-3KR:tH4) (g) as well as their wild-type counterparts in separate plasmids. Cells on the 5-FOA plate lacking wild-type histone genes in the *URA3* plasmid were marked with a'–g'.

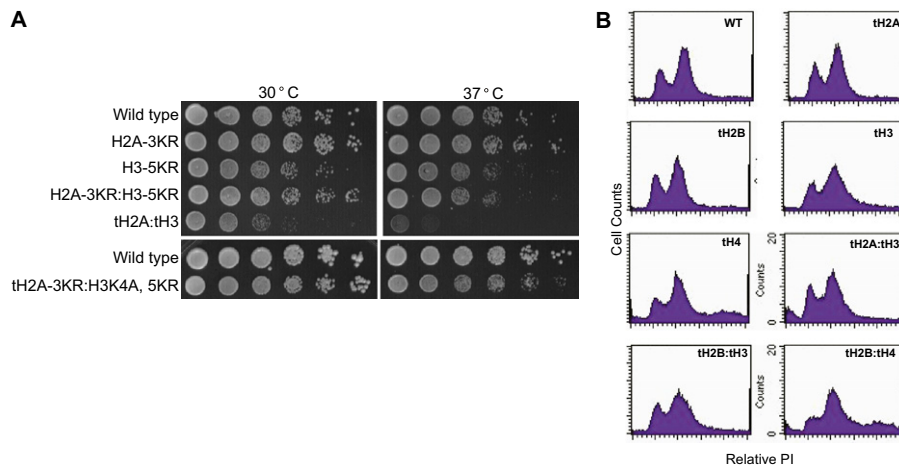

**Fig. S2.** (A) Growth of mutant strains at 30 °C and at 37 °C was tested by spotting 10-fold serially diluted cultures on YPD plates. (B) Cell cycle profiles of histone tail deletion mutants and wild-type cells were measured by cytometry. Note that the <1C DNA content in the tH2A:tH3 mutant did not consistently appear in independent experiments.

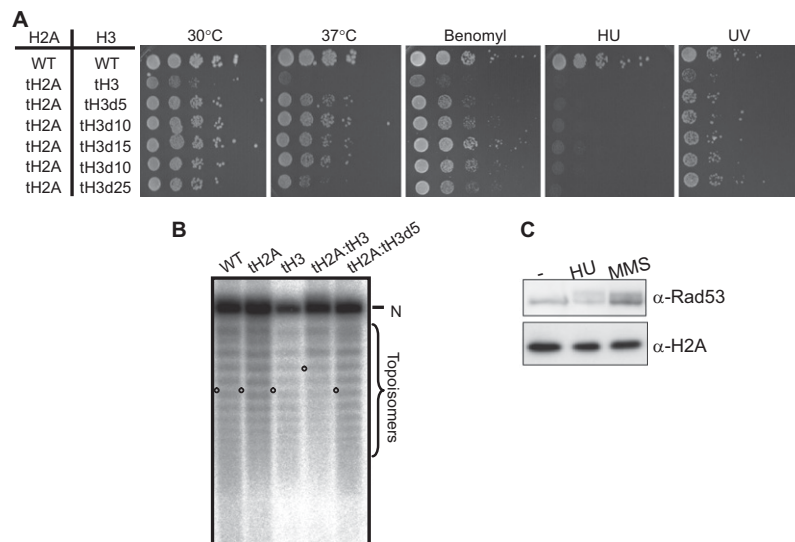

**Fig. S3.** (A) Spotting assays of mutant cells with tailless H2A (tH2A) and serially truncated H3 (tH3d5:Δ1-5, tH3d10:Δ1-10, tH3d15:Δ1-15, tH3d20:Δ1-20, tH3d25:Δ1-25) was done as described in Fig. 2. (B) Superhelical analysis of 2 μM plasmid (ectopically introduced pRS426) in histone tail deletes (tH2A, tH3, tH2A:tH3, tH3, tH2A:tH3d5) and wild-type cells. N, plasmids and the distributed topoisomers of the plasmids were marked with a bracket. The midpoint of topoisomer distribution in each lane is marked with an open circle. (C) tH2A mutant cells were treated with 100 mM HU or 0.2% MMS for 2 h. Whole-cell extracts from the mutant cells were then subjected to immunoblot analyses with the indicated antibodies against Rad53 and H2A.

**Table S1. Combinatory mutations on lysine residues within the H2A and H4 N-tails tested for the effect on cell viability**

| H2A residues |    |     | H4 residues |    |     | Viability |
|--------------|----|-----|-------------|----|-----|-----------|
| K4           | K7 | K13 | K5          | K8 | K12 |           |
| R            | R  | R   | R           | R  | R   | Inviable  |
| R            | R  | —   | R           | R  | R   | Viable    |
| —            | R  | R   | R           | R  | R   | Viable    |
| R            | —  | R   | R           | R  | R   | Viable    |
| R            | R  | R   | R           | R  | —   | Viable    |
| R            | R  | R   | —           | R  | R   | Viable    |
| R            | R  | R   | R           | —  | R   | Viable    |

Individual lysine residues substituted to arginines are marked with R in boxes.

**Table S2. Doubling time of histone tail delete-mutants in YPD media at 30 °C**

| Strain   | Time, min |
|----------|-----------|
| WT       | 110       |
| tH2A     | 119       |
| tH2B     | 100       |
| tH3      | 150       |
| tH4      | 217       |
| tH2A:tH3 | 341       |
| tH2B:tH3 | 150       |
| tH2B:tH4 | 207       |

Overnight culture of each strain was transferred to liquid YPD media in a density of  $1 \times 10^6$  cells/mL. Cell numbers in individual cultures were counted with hemicytometer in every 15 min for 6 h.

**Table S3. Redundant roles for histone N-tails in pairs**

| N-tail deletion | Viability | Temperatures, °C |    |    | Benomyl | 6-AU | HU | Phleomycin | UV | Ref.       |
|-----------------|-----------|------------------|----|----|---------|------|----|------------|----|------------|
|                 |           | 16               | 30 | 37 |         |      |    |            |    |            |
| H2A/H2B         | x         | nd               | nd | nd | nd      | nd   | nd | nd         | nd | (1)        |
| H3/H4           | x         | nd               | nd | nd | nd      | nd   | nd | nd         | nd | (2)        |
| H2A/H3          |           | x                | x  | x  | x       | x    | x  | x          | x  | This study |
| H2A/H4          | x         | nd               | nd | nd | nd      | nd   | nd | nd         | nd | This study |
| H2B/H3          |           |                  |    |    |         | x    | x  |            |    | This study |
| H2B/H4          |           |                  |    |    |         |      | x  | x          | x  | This study |

nd, not determined phenotypes; x, synergistic defective phenotypes detected. Blank cells indicate that no phenotypic defect was observed.

- Schuster T, Han M, Grunstein M (1986) Yeast histone H2A and H2B amino termini have interchangeable functions. *Cell* 45:445–451.
- Ling X, Harkness TA, Schultz MC, Fisher-Adams G, Grunstein M (1996) Yeast histone H3 and H4 amino termini are important for nucleosome assembly in vivo and in vitro: Redundant and position-independent functions in assembly but not in gene regulation. *Genes Dev* 10:686–699.

**Table S4. Yeast strains used in this study**

| Strain name | Genotypes                                                                                                                                                                            | Used in                         |
|-------------|--------------------------------------------------------------------------------------------------------------------------------------------------------------------------------------|---------------------------------|
| YJK341      | <i>MATa his3-1 leu2-0 met15-0 ura3-0 hht1-hhf1::KAN hhf-2hht2::NAT hta1-htb1::HPH hta2-htb2::NAT p[CEN URA3 HTA1-HTB1-HHT2-HHF2] p[CEN LEU2 HTA1-HTB1-HHT2-HHF2]</i>                 | Figs. 1 B and D, and S1 B and C |
| YJK346      | <i>MATa his3-1 leu2-0 met15-0 ura3-0 hht1-hhf1::KAN hhf-2hht2::NAT hta1-htb1::HPH hta2-htb2::NAT p[CEN URA3 HTA1-HTB1-HHT2-HHF2] p[CEN LEU2]</i>                                     | Figs. 1 B and D, and S1 B and C |
| YJK342      | <i>MATa his3-1 leu2-0 met15-0 ura3-0 hht1-hhf1::KAN hhf-2hht2::NAT hta1-htb1::HPH hta2-htb2::NAT p[CEN URA3 HTA1-HTB1 HHT2-HHF2] p[CEN LEU2 hta1Δ(1-20)-HTB1-HHT2-HHF2]</i>          | Figs. 1B, S2, and S3            |
| YJK343      | <i>MATa his3-1 leu2-0 met15-0 ura3-0 hht1-hhf1::KAN hhf-2hht2::NAT hta1-htb1::HPH hta2-htb2::NAT p[CEN URA3 HTA1-HTB1 HHT2-HHF2] p[CEN LEU2 HTA1-htb1Δ(1-32)-HHT2-HHF2]</i>          | Figs. 1B and S2                 |
| YJK344      | <i>MATa his3-1 leu2-0 met15-0 ura3-0 hht1-hhf1::KAN hhf-2hht2::NAT hta1-htb1::HPH hta2-htb2::NAT p[CEN URA3 HTA1-HTB1 HHT2-HHF2] p[CEN LEU2 HTA1-HTB1-hht2Δ(1-30)-HHT2-HHF2]</i>     | Figs. 1B and S2                 |
| YJK363      | <i>MATa his3-1 leu2-0 met15-0 ura3-0 hht1-hhf1::KAN hhf-2hht2::NAT hta1-htb1::HPH hta2-htb2::NAT p[CEN URA3 HTA1-HTB1 HHT2-HHF2] p[CEN LEU2 HTA1-HTB1-HHT2-hhf2Δ(1-16)]</i>          | Figs. 1B, S1C, and S2           |
| YJK367      | <i>MATa his3-1 leu2-0 met15-0 ura3-0 hht1-hhf1::KAN hhf-2hht2::NAT hta1-htb1::HPH hta2-htb2::NAT p[CEN URA3 HTA1-HTB1 HHT2-HHF2] p[CEN LEU2 hta1Δ(1-20)-HTB1-hht2Δ(1-30)-HHF2]</i>   | Figs. 1B and S2                 |
| YJK364      | <i>MATa his3-1 leu2-0 met15-0 ura3-0 hht1-hhf1::KAN hhf-2hht2::NAT hta1-htb1::HPH hta2-htb2::NAT p[CEN URA3 HTA1-HTB1 HHT2-HHF2] p[CEN LEU2 hta1Δ(1-20)-HTB1-hht2Δ(1-16)]</i>        | Figs. 1 B and D, S1B and S2     |
| YJK345      | <i>MATa his3-1 leu2-0 met15-0 ura3-0 hht1-hhf1::KAN hhf-2hht2::NAT hta1-htb1::HPH hta2-htb2::NAT p[CEN URA3 HTA1-HTB1 HHT2-HHF2] p[CEN LEU2 HTA1- htb1Δ(1-32)- hht2Δ(1-30)-HHF2]</i> | Figs. 1B and S2                 |
| YJK365      | <i>MATa his3-1 leu2-0 met15-0 ura3-0 hht1-hhf1::KAN hhf-2hht2::NAT hta1-htb1::HPH hta2-htb2::NAT p[CEN URA3 HTA1-HTB1 HHT2-HHF2] p[CEN LEU2 HTA1- htb1Δ(1-32)-HHT2-hhf2Δ(1-16)]</i>  | Figs. 1B and S2                 |
| YJK544      | <i>MATa his3-1 leu2-0 met15-0 ura3-0 hht1-hhf1::KAN hhf-2hht2::NAT hta1-htb1::HPH hta2-htb2::NAT p[CEN URA3 HTA1-HTB1 HHT2-HHF2] p[CEN LEU2 hta1K4,7,13R-HTB1-HHT2-HHF2]</i>         | Fig. S1C                        |
| YJK545      | <i>MATa his3-1 leu2-0 met15-0 ura3-0 hht1-hhf1::KAN hhf-2hht2::NAT hta1-htb1::HPH hta2-htb2::NAT p[CEN URA3 HTA1-HTB1 HHT2-HHF2] p[CEN LEU2 HTA1-HTB1-HHT2-hhf2K5,8,12R]</i>         | Fig. S1C                        |
| YJK546      | <i>MATa his3-1 leu2-0 met15-0 ura3-0 hht1-hhf1::KAN hhf-2hht2::NAT hta1-htb1::HPH hta2-htb2::NAT p[CEN URA3 HTA1-HTB1 HHT2-HHF2] p[CEN LEU2 hta1K4,7,13R-HTB1-HHT2-hhf2K5,8,12R]</i> | Fig. S1C                        |
| YJK551      | <i>MATa his3-1 leu2-0 met15-0 ura3-0 hht1-hhf1::KAN hhf-2hht2::NAT hta1-htb1::HPH hta2-htb2::NAT p[CEN URA3 HTA1-HTB1 HHT2-HHF2] p[CEN LEU2 hta1K4,7,13R-HTB1-HHT2-hhf2K5,8,12R]</i> | Fig. S1C                        |
| YJK540      | <i>MATa his3-1 leu2-0 met15-0 ura3-0 hht1-hhf1::KAN hhf-2hht2::NAT hta1-htb1::HPH hta2-htb2::NAT p[CEN URA3 HTA1-HTB1 HHT2-HHF2] p[CEN LEU2 hyb::hta1-HTB1-HHT2-hhf2K5,8,12HHF2]</i> | Fig. 1D                         |
| YJK541      | <i>MATa his3-1 leu2-0 met15-0 ura3-0 hht1-hhf1::KAN hhf-2hht2::NAT hta1-htb1::HPH hta2-htb2::NAT p[CEN URA3 HTA1-HTB1 HHT2-HHF2] p[CEN LEU2 HTA1-HTB1-HHT2-htb::HHF2]</i>            | Fig. 1D                         |
| YJK542      | <i>MATa his3Δ1 leu2Δ0 met15Δ0 ura3Δ0 hht1-hhf1::KAN hhf-2hht2::NAT hta1-htb1::HPH hta2-htb2::NAT p[CEN URA3 HTA1-HTB1 HHT2-HHF2] p[CEN LEU2 hyb::HTA1-HTB1-HHT2-hyb::HHF2]</i>       | Fig. 1D                         |
| CDAY251     | <i>MATa his3-1 leu2-0 met15-0 ura3-0 hht1-hhf1::KAN hhf-2hht2::NAT hta1-htb1::HPH hta2-htb2::NAT p[CEN LEU2 HTA1-HTB1-HHT2-HHF2]</i>                                                 | Ref. 1 figures 2–4              |
| YJK347      | <i>MATa his3-1 leu2-0 met15-0 ura3-0 hht1-hhf1::KAN hhf-2hht2::NAT hta1-htb1::HPH hta2-htb2::NAT p[CEN LEU2 hta1Δ(1-20)-HTB1-HHT2-HHF2]</i>                                          | Figs. 2–4                       |
| YJK348      | <i>MATa his3-1 leu2-0 met15-0 ura3-0 hht1-hhf1::KAN hhf-2hht2::NAT hta1-htb1::HPH hta2-htb2::NAT p[CEN LEU2 HTA1-htb1Δ(1-32)-HHT2-HHF2]</i>                                          | Figs. 2 and 3                   |
| YJK349      | <i>MATa his3-1 leu2-0 met15-0 ura3-0 hht1-hhf1::KAN hhf-2hht2::NAT hta1-htb1::HPH hta2-htb2::NAT p[CEN LEU2 HTA1-HTB1-hht2Δ(1-30)-HHT2-HHF2]</i>                                     | Figs. 2 and 3                   |
| YJK357      | <i>MATa his3-1 leu2-0 met15-0 ura3-0 hht1-hhf1::KAN hhf-2hht2::NAT hta1-htb1::HPH hta2-htb2::NAT p[CEN LEU2 HTA1-HTB1-HHT2-hhf2 Δ(1-16)]</i>                                         | Figs. 2 and 3                   |
| YJK368      | <i>MATa his3-1 leu2-0 met15-0 ura3-0 hht1-hhf1::KAN hhf-2hht2::NAT hta1-htb1::HPH hta2-htb2::NAT p[CEN LEU2 hta1Δ(1-20)-HTB1- hht2 Δ(1-30)-HHF2]</i>                                 | Figs. 2–4                       |
| YJK350      | <i>MATa his3-1 leu2-0 met15-0 ura3-0 hht1-hhf1::KAN hhf-2hht2::NAT hta1-htb1::HPH hta2-htb2::NAT p[CEN LEU2 HTA1- htb1Δ(1-32)- hht2Δ(1-30)-HHF2]</i>                                 | Figs. 2 and 3                   |
| YJK369      | <i>MATa his3-1 leu2-0 met15-0 ura3-0 hht1-hhf1::KAN hhf-2hht2::NAT hta1-htb1::HPH hta2-htb2::NAT p[CEN LEU2 HTA1- htb1Δ(1-32)-HHT2-hhf2Δ(1-16)]</i>                                  | Figs. 2 and 3                   |
| YJK389      | <i>MATa his3-1 leu2-0 met15-0 ura3-0 hht1-hhf1::KAN hhf-2hht2::NAT hta1-htb1::HPH hta2-htb2::NAT p[CEN LEU2 hta1Δ(1-20)-HTB1-hht2Δ(1-5)-HHF2]</i>                                    | Fig. 4                          |
| YJK390      | <i>MATa his3-1 leu2-0 met15-0 ura3-0 hht1-hhf1::KAN hhf-2hht2::NAT hta1-htb1::HPH hta2-htb2::NAT p[CEN LEU2 hta1Δ(1-20)-HTB1-hht2Δ (1-10)-HHF2]</i>                                  | Fig. S3                         |
| YJK391      | <i>MATa his3-1 leu2-0 met15-0 ura3-0 hht1-hhf1::KAN hhf-2hht2::NAT hta1-htb1::HPH hta2-htb2::NAT p[CEN LEU2 hta1Δ(1-20)-HTB1-hht2Δ(1-15)-HHF2]</i>                                   | Fig. S3                         |
| YJK392      | <i>MATa his3-1 leu2-0 met15-0 ura3-0 hht1-hhf1::KAN hhf-2hht2::NAT hta1-htb1::HPH hta2-htb2::NAT p[CEN LEU2 hta1Δ(1-20)-HTB1-hht2Δ(1-20)-HHF2]</i>                                   | Fig. S3                         |
| YJK393      | <i>MATa his3-1 leu2-0 met15-0 ura3-0 hht1-hhf1::KAN hhf-2hht2::NAT hta1-htb1::HPH hta2-htb2::NAT p[CEN LEU2 hta1Δ(1-20)-HTB1-hht2Δ(1-25)-HHF2]</i>                                   | Fig. S3                         |
| YJK402      | <i>MATa his3-1 leu2-0 met15-0 ura3-0 hht1-hhf1::KAN hhf-2hht2::NAT hta1-htb1::HPH hta2-htb2::NAT p[CEN LEU2 HTA1-HTB1-hht2Δ(1-5)-HHF2]</i>                                           | Fig. 4                          |

Table S4. Cont.

| Strain name | Genotypes                                                                                                                                                  | Used in |
|-------------|------------------------------------------------------------------------------------------------------------------------------------------------------------|---------|
| YJK411      | <i>MATa his3-1 leu2-0 met15-0 ura3-0 hht1-hhf1::KAN hhf-2hht2::NAT hta1-htb1::HPH hta2-htb2::NAT p[CEN LEU2 hta1Δ(1-20)-HTB1-hht2S1A-HHF2]</i>             | Fig. 4  |
| YJK412      | <i>MATa his3-1 leu2-0 met15-0 ura3-0 hht1-hhf1::KAN hhf-2hht2::NAT hta1-htb1::HPH hta2-htb2::NAT p[CEN LEU2 hta1Δ(1-20)-HTB1-hht2K4A-HHF2]</i>             | Fig. 4  |
| YJK413      | <i>MATa his3-1 leu2-0 met15-0 ura3-0 h ht1-hhf1::KAN hhf-2hht2::NAT hta1-htb1::HPH hta2-htb2::NAT p[CEN LEU2 hta1Δ(1-20)-HTB1-hht2Q5A-HHF2]</i>            | Fig. 4  |
| YJK556      | <i>MATa his3-1 leu2-0 met15-0 ura3-0 hht1-hhf1::KAN hhf-2hht2::NAT hta1-htb1::HPH hta2-htb2::NAT p[CEN LEU2 hta1Δ(1-20)-HTB1-hht2R2A-HHF2]</i>             | Fig. 4  |
| YJK557      | <i>MATa his3-1 leu2-0 met15-0 ura3-0 hht1-hhf1::KAN hhf-2hht2::NAT hta1-htb1::HPH hta2-htb2::NAT p[CEN LEU2 hta1Δ(1-20)-HTB1-hht2T3A-HHF2]</i>             | Fig. 4  |
| YJK463      | <i>MATa his3-1 leu2-0 met15-0 ura3-0 hht1-hhf1::KAN hhf-2hht2::NAT hta1-htb1::HPH hta2-htb2::NAT set1Δ::URA3 p[CEN LEU2 HTA1-HTB1-HHT2-HHF2]</i>           | Fig. 4  |
| YJK558      | <i>MATa his3-1 leu2-0 met15-0 ura3-0 hht1-hhf1::KAN hhf-2hht2::NAT hta1-htb1::HPH hta2-htb2::NAT p[CEN LEU2 HTA1-HTB1-hht2K4A-HHF2]</i>                    | Fig. 4  |
| YJK468      | <i>MATa his3-1 leu2-0 met15-0 ura3-0 hht1-hhf1::KAN hhf-2hht2::NAT hta1-htb1::HPH hta2-htb2::NAT set1Δ::URA3 p[CEN LEU2 HTA1-HTB1-hht2K4A-HHF2]</i>        | Fig. 4  |
| YJK559      | <i>MATa his3-1 leu2-0 met15-0 ura3-0 hht1-hhf1::KAN hhf-2hht2::NAT hta1-htb1::HPH hta2-htb2::NAT set1Δ::URA3 p[CEN LEU2 hta1Δ(1-20)-HTB1-hht2K4A-HHF2]</i> | Fig. 4  |

1. Ahn SH, et al. (2005) Sterile 20 kinase phosphorylates histone H2B at serine 10 during hydrogen peroxide-induced apoptosis in *S. cerevisiae*. *Cell* 120:25–36.
